# Supplementary material for: Untargeted metabolomics of colonic digests reveals kynurenine pathway metabolites, dityrosine and 3-dehydroxycarnitine as red versus white meat discriminating metabolites
Source: PubMed Central journal article supplement (PMC5307356; doi:10.1038/srep42514), 2017-02-14

## Supporting information

### **Untargeted metabolomics of colonic digests reveals kynurenine pathway metabolites, dityrosine and 3-dehydroxycarnitine as red versus white meat discriminating metabolites**

Caroline Rombouts<sup>1</sup>, Lieselot Y. Hemeryck<sup>1</sup>, Thomas Van Hecke<sup>2</sup>, Stefaan De Smet<sup>2</sup>, Winnok H. De Vos<sup>3,4</sup> and Lynn Vanhaecke<sup>1\*</sup>

<sup>1</sup> Ghent University, Faculty of Veterinary Medicine, Department of Veterinary Public Health and Food Safety, Laboratory of Chemical Analysis, Salisburylaan 133, B-9820 Merelbeke, Belgium

<sup>2</sup> Ghent University, Faculty of Bioscience Engineering, Department of Animal Production, Laboratory of Animal Nutrition and Animal Product Quality, Proefhoevestraat 10, B-9090 Melle, Belgium

<sup>3</sup> Ghent University, Faculty of Bioscience Engineering, Department of Molecular Biotechnology, Laboratory of Cell Systems & Imaging, Coupure Links 653, B-9000 Ghent, Belgium

<sup>4</sup> Antwerp University, Faculty of Pharmaceutical, Biomedical and Veterinary Sciences, Department of Veterinary Sciences, Laboratory of Cell Biology and Histology, Groenenborgerlaan 171, B-2020 Antwerp, Belgium

**\*Correspondence:** Prof. Lynn Vanhaecke, Ghent University, Faculty of Veterinary Medicine, Department of Veterinary Public Health and Food Safety, Laboratory of Chemical Analysis, Salisburylaan 133, B-9820 Merelbeke, Belgium

**E-mail:** [Lynn.Vanhaecke@ugent.be](mailto:Lynn.Vanhaecke@ugent.be)

**Fax:** +32-9-2647492

**Figure S1. MS/MS data (+ ionization mode) used for identification of 3-dehydroxycarnitine. MS/MS fragmentation data (PRM) of  $m/z$  146.11708.**

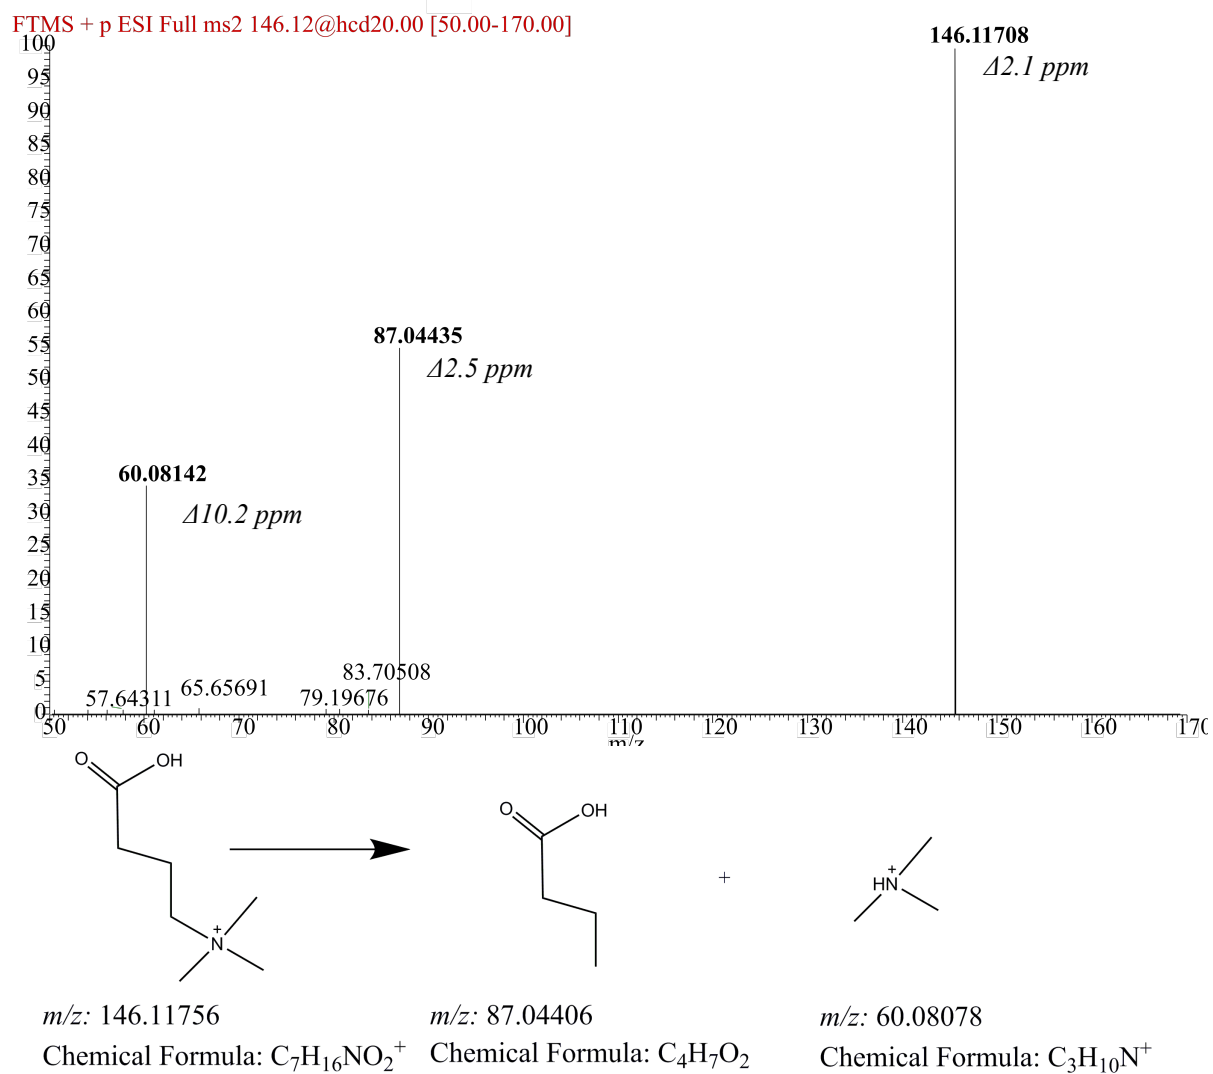

**Figure S2. MS/MS data (+ ionization mode) used for identification of kynurenic acid.**

MS/MS fragmentation data (PRM) of  $m/z$  190.04919.

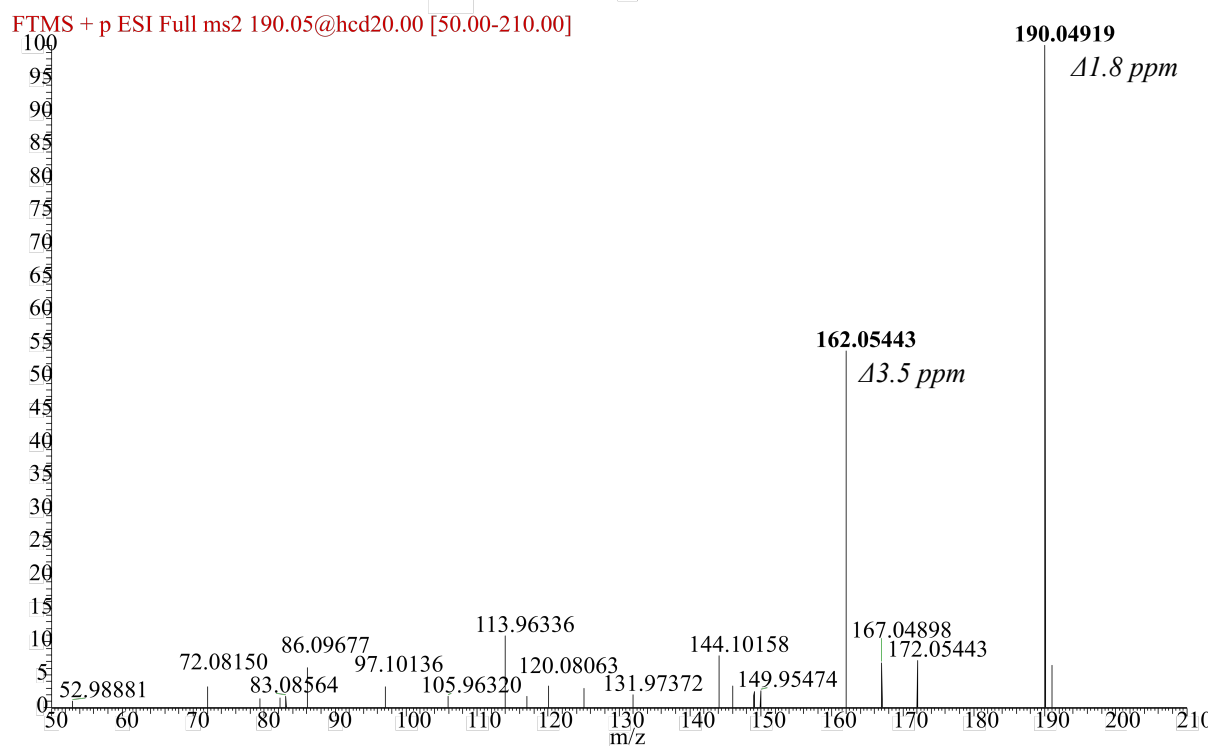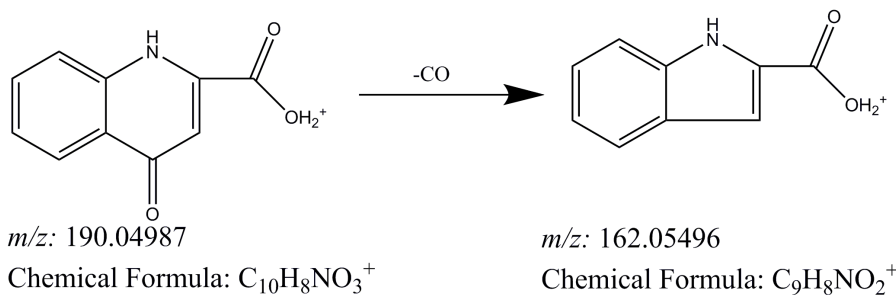

**Figure S3. MS/MS data (+ ionization mode) used for identification of L-kynurenine.**

MS/MS fragmentation data (PRM) of  $m/z$  209.09186.

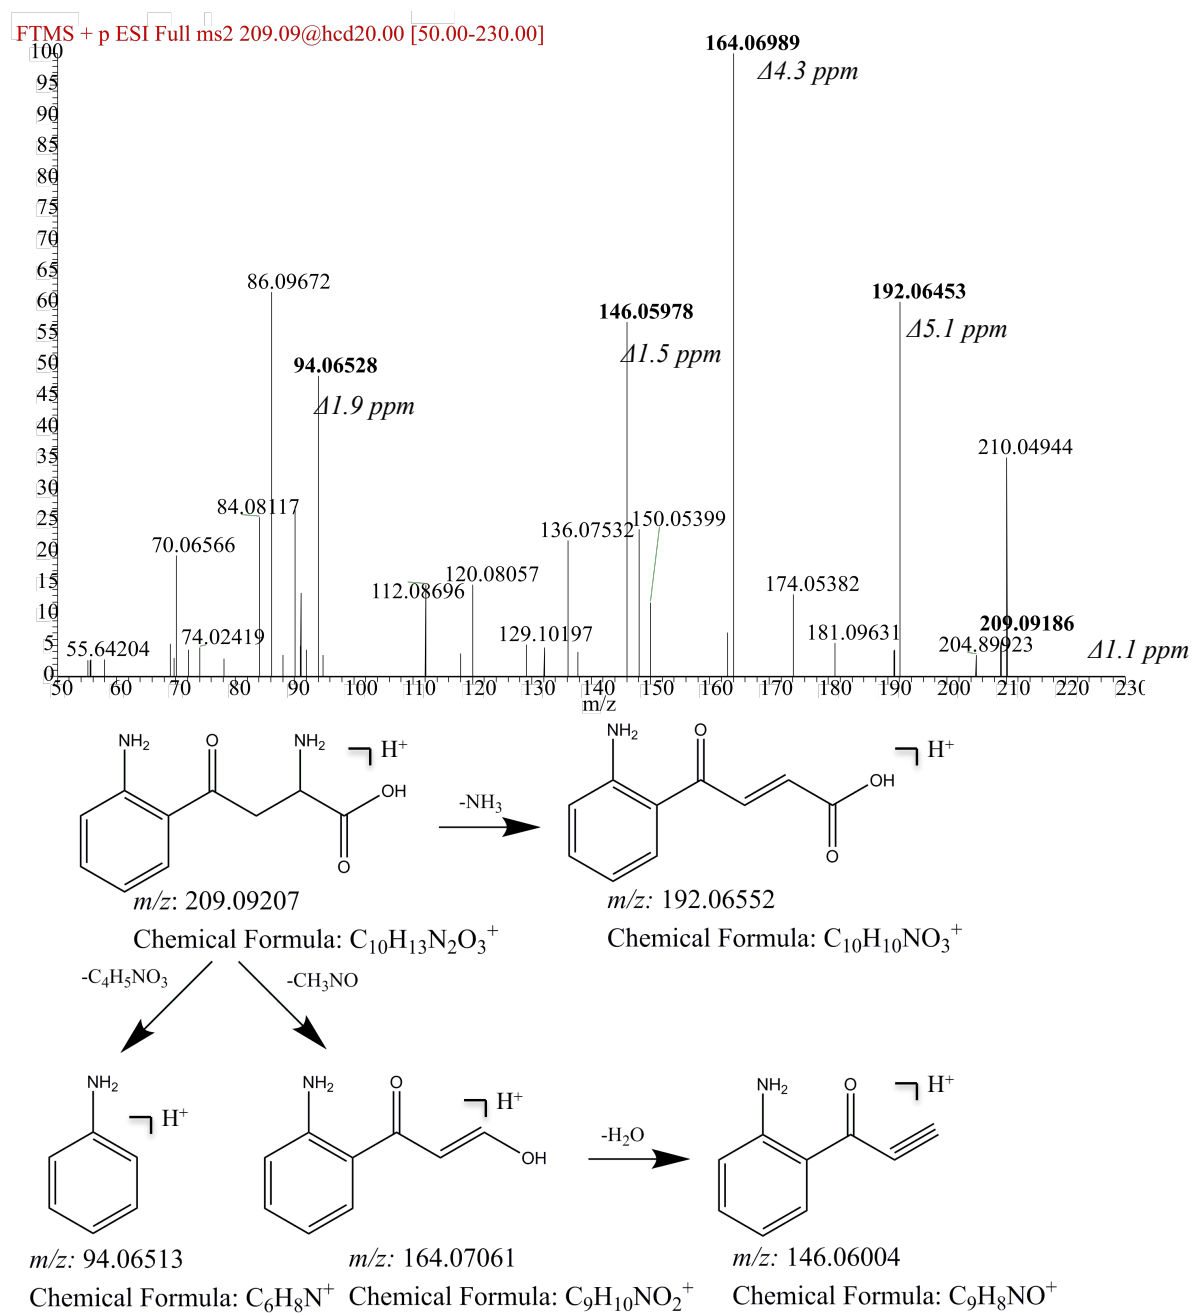

**Figure S4. MS/MS data (+ ionization mode) used for identification of N'-formylkynurenine. MS/MS fragmentation data (PRM) of  $m/z$  237.08652.**

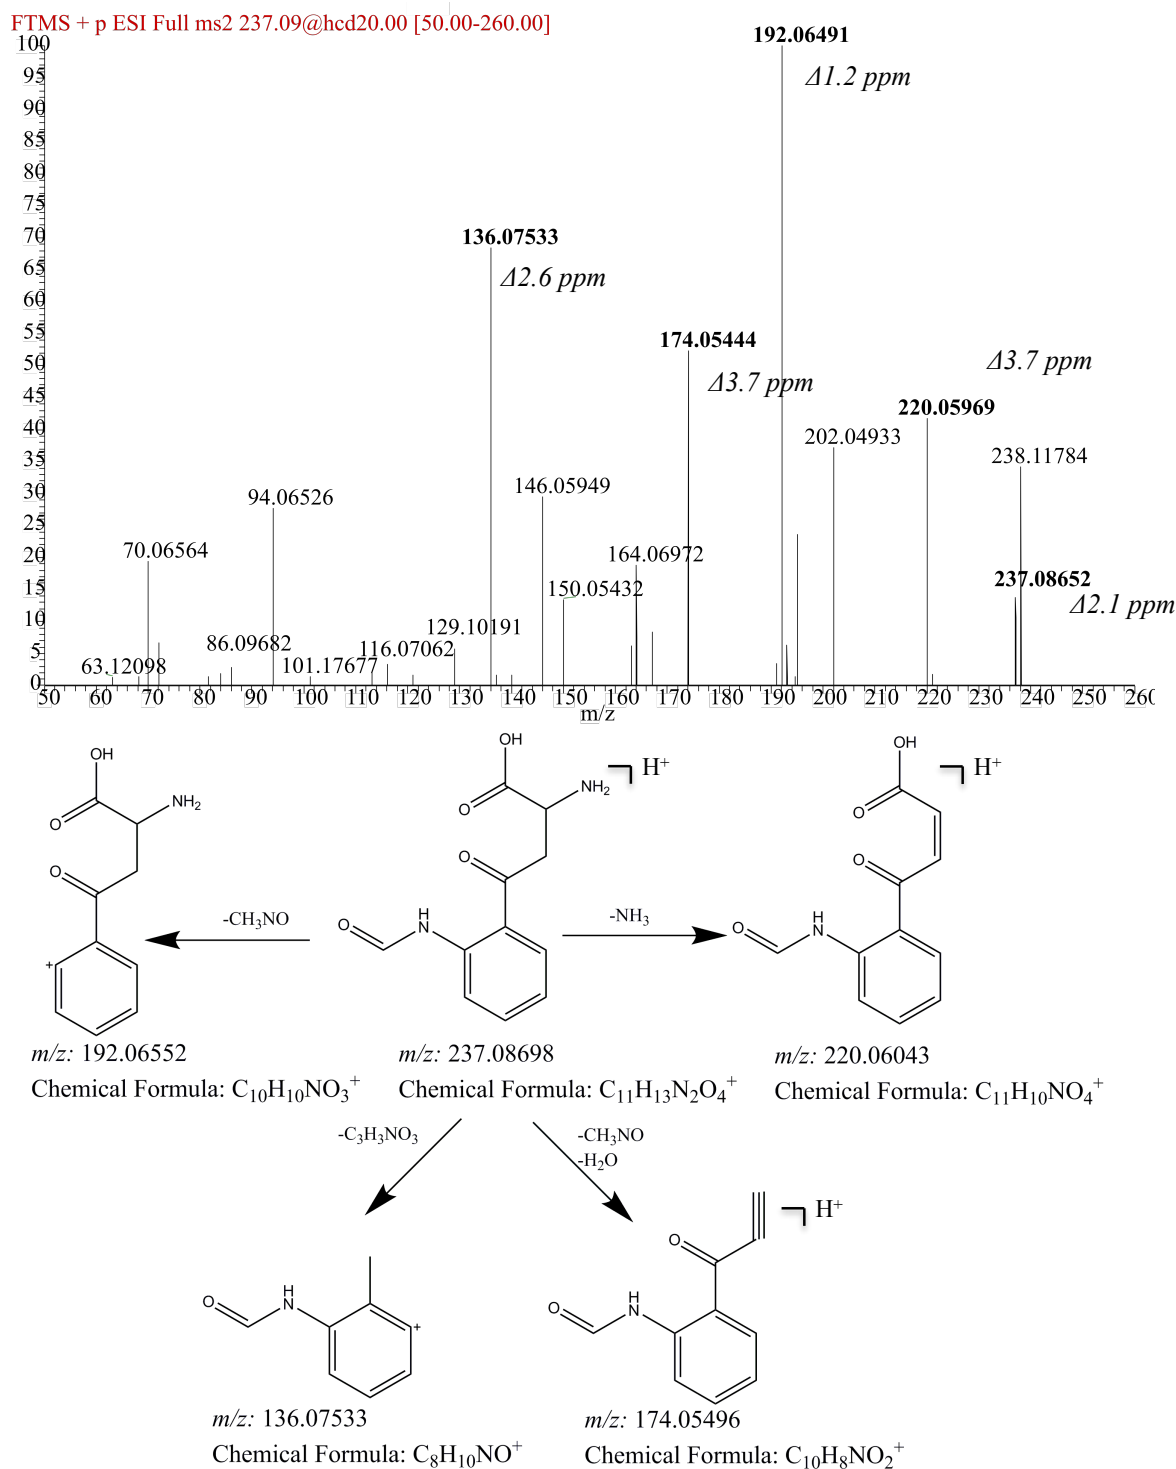

**Figure S5. MS/MS data (- ionization mode) used for identification of dityrosine.**

MS/MS fragmentation data (PRM) of  $m/z$  359.12482.

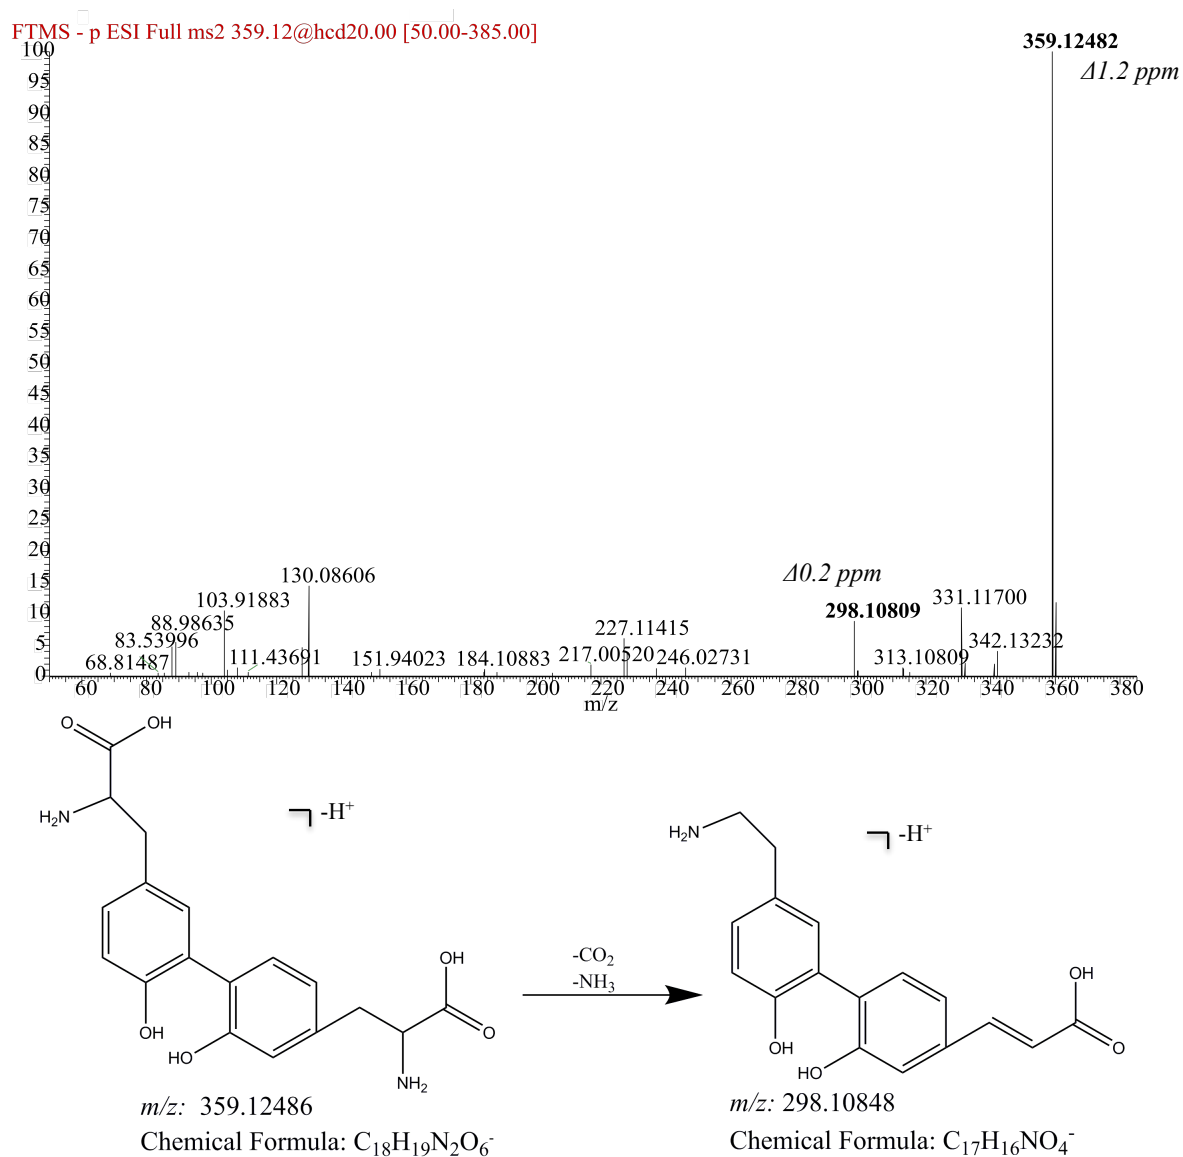

Supplement: srep42514-s1.pdf [file srep42514-s1.pdf]
